# Supplementary material for: Associations between cortisol awakening response and resting electroencephalograph asymmetry
Source: PeerJ. 2019 Jun 3;7:e7059. doi: 10.7717/peerj.7059 (PMC6553442; doi:10.7717/peerj.7059)
Supplement: Supplemental Information 1 — The relationship between CAR and alpha asymmetry. [file peerj-07-7059-s001.xlsx]

## Sheet: CAR and alpha
sub.No	exam	age	sleep duration	awakening time	sleep quality	PSS	STAIS	STAIT	STAI	waking	15min	30min	60min	R30	AUCg	AUCi	logS1	logR30	logAUCg	logAUCi	FC区	FC3	FC1	FCZ	FC2	FC4
5	1	21.7	6.5	6.5	32	15	31	31	62	10.69	10	11.275	8.725	0.585	10.2456	-0.444375	1.02898	0.0231388	1.00836	-0.0206204	0.0336443	1.02187	1.22856	1.04237	1.12736	1.19035
6	1	23.3	7.41667	6.665	25	17	34	38	72	13.755	12.575	7.59	6.165	-6.165	9.25062	-4.50437	1.13846	-0.258219	0.944759	-0.193702	-0.104561	1.37244	1.41694	1.17061	1.40111	1.17915
7	1	22.3	7.00833	6.65	28.5	13	22	26	48	12.595	11.21	11.465	7.585	-1.13	10.5725	-2.0225	1.1002	-0.0408241	1.01718	-0.0830178	0.0618903	1.37131	1.40089	1.35805	1.4818	1.41418
8	1	23	6.25	6.5	26.5	20	38	39	77	9.7	13.415	13.96	13.93	4.26	13.2837	3.58375	0.986772	0.158114	1.12056	0.133792	-0.0330818	1.55008	1.62107	1.43611	1.62245	1.48254
9	1	22.4	6.5	7.66	24	22	23	43	66	16.205	19.51	18.135	16.03	1.93	17.7112	1.50625	1.20965	0.0488685	1.24695	0.0372989	-0.103389	1.65163	1.72349	1.685	1.66877	1.49957
10	1	22.4	8.075	6.955	24.5	18	29	34	63	19.53	17.535	14.535	7.9	-4.995	14.2506	-5.27937	1.2907	-0.128287	1.13263	-0.158076	-0.0212245	0.658161	0.627346	0.580501	0.631666	0.611393
13	1	23.1	6.625	6.75	24	16	27	29	56	10.455	15.015	17.58	21.32	7.125	16.9831	6.52813	1.01932	0.225695	1.22063	0.201302	-0.000963373	1.75577	1.70276	1.72437	1.64965	1.80695
14	1	22.2	7	6.6	17	19	39	43	82	11.185	8.43	13.185	12.695	2	11.6237	0.43875	1.04864	0.0714441	1.05847	0.00983863	0.0220342	0.951269	1.10738	0.858747	1.04365	1.05907
16	1	22.2	6.16667	6.52	17	22	45	44	89	10.52	13.445	12.73	9.83	2.21	11.9075	1.3875	1.02202	0.0828127	1.07234	0.0503255	-0.085836	1.69469	1.70316	1.53844	1.69849	1.52768
17	1	22.8	6.6	7	24	15	39	38	77	40.24	28.855	27.15	18.625	-13.09	27.0813	-13.1587	1.60466	-0.170888	1.42083	-0.183833	0.143627	0.766284	0.794225	0.761072	0.92682	0.920944
18	1	22.6	7.25	6.46	25	15	24	33	57	5.86	7.15	9.99	8.96	4.13	8.50625	2.64625	0.767898	0.231668	0.922478	0.15458	-0.128613	1.13574	1.06941	0.959902	0.929239	1.01869
19	1	21.3	7.125	6.695	25.5	13	25	29	54	18.17	22.5	23.43	18.38	5.26	21.2775	3.1075	1.25935	0.110417	1.32522	0.0658611	-0.016346	0.748503	0.823432	1.03517	0.76983	0.769413
20	1	22.3	7.10833	7	26.5	14	19	27	46	11.34	15.685	10.6	14.93	-0.74	13.0463	1.70625	1.05461	-0.0293072	1.1087	0.0540894	-0.0698701	1.68173	1.77962	1.56172	1.7788	1.54281
21	1	21.2	6.25	8	24.5	18	34	39	73	18.23	26.87	25.805	13.215	7.575	21.9769	3.74688	1.26079	0.150917	1.32457	0.0637843	0.0166053	1.02208	1.04054	0.898779	1.02972	1.06612
22	1	22.7	7	7.75	22	21	37	44	81	41.405	48.205	33.12	15.09	-8.285	33.4194	-7.98562	1.61705	-0.0969625	1.48761	-0.129442	-0.00991304	0.688848	0.761601	0.663482	0.741599	0.689024
23	1	21.7	8.25	6.6	22.5	18	21	29	50	9.365	13.095	20.335	14.33	10.97	15.6525	6.2875	0.971508	0.336736	1.18037	0.20886	-0.00755422	1.15845	0.989847	1.0687	1.12852	1.00466
24	1	24.5	7.05	7	21.5	17	25	27	52	32.415	37.87	27.05	19.855	-5.365	28.6269	-3.78812	1.51075	-0.0785788	1.44495	-0.0657987	0.0882935	1.95543	1.58123	2.22798	1.67199	2.04126
26	1	22.6	6.91667	6.665	21.5	18	26	31	57	15.29	18.94	14.135	16.09	-1.155	15.9694	0.679375	1.18441	-0.0341117	1.2004	0.0159884	0.00716216	1.49391	1.55532	1.48071	1.55045	1.51311
27	1	21.4	7.25	6.5	22	17	30	32	62	20.22	13.775	14.745	6.07	-5.475	13.0181	-7.20188	1.30578	-0.137136	1.08203	-0.223747	-0.0123805	1.90439	2.07828	1.88927	2.12752	1.83039
28	1	21.3	6.75	6.5	26	15	25	26	51	9.895	13.075	11.455	13.91	1.56	12.2788	2.38375	0.995416	0.0635793	1.08649	0.0910765	0.0609638	0.885244	0.891689	0.753952	0.759642	1.13922
29	1	22.4	7.25	7.25	23.5	17	23	31	54	14.32	16.39	14.725	17.37	0.405	15.7519	1.43188	1.15594	0.0121123	1.19611	0.0401653	-0.0120297	1.57677	1.70989	1.5937	1.69121	1.57139
30	1	21.9	7.17	7.25	26	22	39	46	85	7.745	11.345	10.55	10.455	2.805	10.3744	2.62938	0.889021	0.134231	1.01338	0.124358	-0.0441699	1.83123	1.82486	1.942	1.83021	1.73754
35	1	21.8	7.20833	7.085	20	16	30	31	61	3.79	5.16	5.745	7.475	1.955	5.78688	1.99687	0.578639	0.180651	0.753629	0.17499	-0.00989184	1.48981	1.58951	1.40487	1.62495	1.43459
36	1	21.6	8.04167	8	30.5	19	23	30	53	14.095	11.455	10.815	5.555	-3.28	10.07	-4.025	1.14907	-0.115039	0.982313	-0.166752	-0.0202527	1.35812	1.40941	1.306	1.39011	1.33691
37	1	24.3	7.08333	7.6	19.5	14	20	31	51	19.74	18.115	21.195	8.435	1.46	17.05	-2.68	1.29535	0.0308863	1.20529	-0.0900604	0.0130328	1.31552	1.33574	1.16906	1.37724	1.30008
38	1	22.1	7.125	8.04	27	16	28	30	58	12.55	12.865	12	8.375	-0.55	11.3788	-1.17125	1.09864	-0.0194625	1.05012	-0.0485216	-0.0188681	1.33812	1.39102	1.33673	1.54472	1.14668
39	1	21.5	7.08	8	22.5	16	40	42	82	12.735	12.985	10.81	8.43	-1.925	10.9994	-1.73562	1.105	-0.0711733	1.03563	-0.0693721	0.0756346	2.01825	2.02399	2.29774	1.83445	2.35906
40	1	22.2	7	7.125	22.5	22	24	31	55	9.29	14.71	15.85	13.895	6.56	14.2562	4.96625	0.968016	0.232014	1.14863	0.180615	0.0426259	1.10168	1.12332	1.12998	1.1331	1.17715
41	1	23.6	5.79167	7	26.5	16	33	40	73	17.255	25.83	23.205	14.955	5.95	21.055	3.8	1.23691	0.128667	1.31344	0.0765202	-0.0705149	1.24011	1.29684	1.24792	1.29661	1.09931
42	1	22.4	3.33333	6.415	20	20	39	40	79	9.925	13.295	13.75	13.99	3.825	13.2181	3.29312	0.996731	0.141572	1.11883	0.122101	-0.068846	1.63362	1.67693	1.49765	1.7062	1.46666
43	1	22	7.43333	7.22	20.5	19	34	36	70	18.26	17.59	20.02	10.13	1.76	16.72	-1.54	1.2615	0.0399633	1.20846	-0.0530453	0.00905633	1.24744	1.09689	1.09792	1.21588	1.14656
44	0	21.8	8.29167	7.47	24	22	30	34	64	11.525	13.285	16.615	16.38	5.09	15.0875	3.5625	1.06164	0.158859	1.17481	0.113171	-0.0597184	1.70935	1.81168	1.61455	1.75761	1.64398
45	1	23.8	6.73333	6.985	27	14	23	34	57	15.49	12.545	19.64	14.05	4.15	15.95	0.46	1.19005	0.10309	1.19522	0.00516981	0.0575504	2.2229	1.96021	2.47583	1.84869	2.44951
46	1	24.1	6.93333	6.9	22.5	15	40	38	78	14.78	15.51	16.66	13.9	1.88	15.4475	0.6675	1.16967	0.0520006	1.18774	0.0180696	-0.0241559	1.14029	1.18669	1.14719	1.10534	1.17333
47	1	22.1	6.5	6.5	22.5	17	43	38	81	10.17	13.3	18.88	17.135	8.71	15.96	5.79	1.00732	0.268681	1.19385	0.186529	-0.00759418	1.61835	1.72015	1.60127	1.72265	1.60065
48	0	22.4	7.25	7.71	23.5	15	29	31	60	11.455	11.76	9.93	10.435	-1.525	10.7044	-0.750625	1.059	-0.0620458	1.02846	-0.0305398	-0.139492	0.967866	1.00709	0.871947	0.9002	0.795773
49	0	21.1	7.16667	8.26	25	9	21	14	35	9.175	14.65	11.84	10.975	2.665	11.9931	2.81813	0.962606	0.110746	1.07439	0.111787	-0.0197296	1.76311	1.82587	1.74925	1.8169	1.73263
51	0	22.8	8.60833	8	28.5	7	16	21	37	9.935	15.455	29.105	22.96	19.17	21.76	11.825	0.997168	0.4668	1.31114	0.313976	-0.0289979	1.18129	1.08837	1.06862	1.10172	1.10994
52	0	24.7	6.775	7.215	30	16	19	27	46	9.8	19.515	19.865	8.515	10.065	15.6819	5.88187	0.991226	0.306862	1.16582	0.174599	0.0290855	1.35998	1.44624	1.44608	1.45254	1.41185
53	0	23.1	8.33333	6.69	26.5	13	25	26	51	14.065	28.98	26.075	22	12.01	24.2812	10.2163	1.14814	0.268085	1.37573	0.227592	-0.0866183	1.39371	1.43779	1.22642	1.41108	1.24719
54	0	22.1	7.5	7.92	30	11	29	29	58	14.975	22.985	27.37	13.32	12.395	21.2119	6.23688	1.17537	0.261908	1.30739	0.132019	-0.0481497	0.906667	0.911032	0.992766	0.892285	0.829114
55	0	21.8	8.5	7.6	21.5	19	29	36	65	10.09	13.235	10.725	8.205	0.635	10.6431	0.553125	1.00389	0.0265061	1.02084	0.0169449	-0.00610386	0.797583	0.91248	0.791135	0.894142	0.803714
56	0	23.5	7.70833	7.67	30	20	24	31	55	22.94	20.475	20.79	11.27	-2.15	18.6	-4.34	1.36059	-0.0427389	1.25506	-0.105537	-0.00534658	1.3719	1.56403	1.4387	1.41094	1.5143
57	0	22.5	7.66667	6.875	26	14	26	27	53	25.155	25.765	20.905	13.295	-4.25	20.7488	-4.40625	1.40062	-0.0803741	1.30385	-0.0967728	-0.0350489	1.68639	1.85398	1.66656	1.84153	1.62875
58	0	22.8	8.11667	7.25	23	19	29	31	60	10.16	14.775	8.465	8	-1.695	10.1381	-0.021875	1.00689	-0.0792667	0.991876	-0.0150175	-0.0446097	1.58373	1.59853	1.53908	1.6012	1.49185
59	0	22.4	7.25	7.615	26	15	20	29	49	16.715	24.155	28.055	15.545	11.34	22.535	5.82	1.22311	0.224904	1.33954	0.116435	0.125788	2.21834	2.27241	2.45509	2.27226	2.47007
60	0	21	7.91667	7.335	26	10	19	25	44	17.04	17.735	22.255	9.165	5.215	17.2006	0.160625	1.23147	0.115958	1.21196	-0.0195096	-0.043823	1.78436	1.82811	1.70712	1.81509	1.70974
61	0	23.2	8.625	7.42	25.5	23	30	30	60	6.9	4.61	8.87	11.035	1.97	8.1	1.2	0.838849	0.109075	0.886946	0.0480967	-0.0093749	0.947442	0.873431	0.941529	0.805104	0.997019
62	0	23.3	7.41667	7.375	25.5	21	36	43	79	13.945	21.36	26.31	21.875	12.365	22.4181	8.47312	1.14442	0.275702	1.34298	0.198566	-0.0194535	1.0072	1.05705	0.909573	1.02949	0.995857
63	0	21.7	7.725	8.665	31.5	17	26	28	54	13.635	16.83	10.875	11.49	-2.76	12.8625	-0.7725	1.13466	-0.0982259	1.10209	-0.0325612	-0.0647869	1.00897	1.00756	1.09278	0.868171	1.01878
64	0	22.1	7.75	7.475	24	12	24	31	55	10.875	13.375	14.56	16.425	3.685	14.2694	3.39438	1.03643	0.126732	1.15119	0.11476	-0.00509647	1.21203	1.30475	1.17486	1.30308	1.2035
65	0	21.1	7.575	7.46	26	10	25	29	54	10.78	12.075	14.585	11.12	3.805	12.6156	1.83563	1.03262	0.131288	1.09754	0.0649215	-0.0126492	1.31626	1.10078	1.37647	1.09859	1.29315
66	0	21.2	7.625	6.95	29	9	20	21	41	13.305	16.365	13.405	11.28	0.1	13.6013	0.29625	1.12401	0.00325194	1.12978	0.00576832	-0.0701617	1.18526	1.15151	1.13546	1.12113	1.07532
67	0	23.7	6.75	6.585	22.5	15	30	32	62	11.25	13.195	23.935	13.08	12.685	16.9506	5.70062	1.05115	0.327881	1.20779	0.156633	0.0282876	1.10399	1.27305	1.10169	1.24171	1.1919
68	0	24.3	9.25	8.5	26	13	22	26	48	6.405	10.015	13.665	14.73	7.26	12.1113	5.70625	0.806519	0.329091	1.06888	0.262363	0.0219967	1.21499	1.21441	1.10141	1.2061	1.26729
#NULL!	#NULL!	#NULL!	#NULL!	#NULL!	#NULL!	#NULL!	#NULL!	#NULL!	#NULL!	#NULL!	#NULL!	#NULL!	#NULL!	#NULL!	#NULL!	#NULL!	#NULL!	#NULL!	#NULL!	#NULL!	#NULL!	#NULL!	#NULL!	#NULL!	#NULL!	#NULL!
#NULL!	#NULL!	#NULL!	#NULL!	#NULL!	#NULL!	#NULL!	#NULL!	#NULL!	#NULL!	#NULL!	#NULL!	#NULL!	#NULL!	#NULL!	#NULL!	#NULL!	#NULL!	#NULL!	#NULL!	#NULL!	#NULL!	#NULL!	#NULL!	#NULL!	#NULL!	#NULL!
#NULL!	#NULL!	#NULL!	#NULL!	#NULL!	#NULL!	#NULL!	#NULL!	#NULL!	#NULL!	#NULL!	#NULL!	#NULL!	#NULL!	#NULL!	#NULL!	#NULL!	#NULL!	#NULL!	#NULL!	#NULL!	#NULL!	#NULL!	#NULL!	#NULL!	#NULL!	#NULL!
#NULL!	#NULL!	#NULL!	#NULL!	#NULL!	#NULL!	#NULL!	#NULL!	#NULL!	#NULL!	#NULL!	#NULL!	#NULL!	#NULL!	#NULL!	#NULL!	#NULL!	#NULL!	#NULL!	#NULL!	#NULL!	#NULL!	#NULL!	#NULL!	#NULL!	#NULL!	#NULL!
#NULL!	#NULL!	#NULL!	#NULL!	#NULL!	#NULL!	#NULL!	#NULL!	#NULL!	#NULL!	#NULL!	#NULL!	#NULL!	#NULL!	#NULL!	#NULL!	#NULL!	#NULL!	#NULL!	#NULL!	#NULL!	#NULL!	#NULL!	#NULL!	#NULL!	#NULL!	#NULL!
#NULL!	#NULL!	#NULL!	#NULL!	#NULL!	#NULL!	#NULL!	#NULL!	#NULL!	#NULL!	#NULL!	#NULL!	#NULL!	#NULL!	#NULL!	#NULL!	#NULL!	#NULL!	#NULL!	#NULL!	#NULL!	#NULL!	#NULL!	#NULL!	#NULL!	#NULL!	#NULL!
#NULL!	#NULL!	#NULL!	#NULL!	#NULL!	#NULL!	#NULL!	#NULL!	#NULL!	#NULL!	#NULL!	#NULL!	#NULL!	#NULL!	#NULL!	#NULL!	#NULL!	#NULL!	#NULL!	#NULL!	#NULL!	#NULL!	#NULL!	#NULL!	#NULL!	#NULL!	#NULL!
#NULL!	#NULL!	#NULL!	#NULL!	#NULL!	#NULL!	#NULL!	#NULL!	#NULL!	#NULL!	#NULL!	#NULL!	#NULL!	#NULL!	#NULL!	#NULL!	#NULL!	#NULL!	#NULL!	#NULL!	#NULL!	#NULL!	#NULL!	#NULL!	#NULL!	#NULL!	#NULL!
#NULL!	#NULL!	#NULL!	#NULL!	#NULL!	#NULL!	#NULL!	#NULL!	#NULL!	#NULL!	#NULL!	#NULL!	#NULL!	#NULL!	#NULL!	#NULL!	#NULL!	#NULL!	#NULL!	#NULL!	#NULL!	#NULL!	#NULL!	#NULL!	#NULL!	#NULL!	#NULL!
#NULL!	#NULL!	#NULL!	#NULL!	#NULL!	#NULL!	#NULL!	#NULL!	#NULL!	#NULL!	#NULL!	#NULL!	#NULL!	#NULL!	#NULL!	#NULL!	#NULL!	#NULL!	#NULL!	#NULL!	#NULL!	#NULL!	#NULL!	#NULL!	#NULL!	#NULL!	#NULL!
#NULL!	#NULL!	#NULL!	#NULL!	#NULL!	#NULL!	#NULL!	#NULL!	#NULL!	#NULL!	#NULL!	#NULL!	#NULL!	#NULL!	#NULL!	#NULL!	#NULL!	#NULL!	#NULL!	#NULL!	#NULL!	#NULL!	#NULL!	#NULL!	#NULL!	#NULL!	#NULL!
#NULL!	#NULL!	#NULL!	#NULL!	#NULL!	#NULL!	#NULL!	#NULL!	#NULL!	#NULL!	#NULL!	#NULL!	#NULL!	#NULL!	#NULL!	#NULL!	#NULL!	#NULL!	#NULL!	#NULL!	#NULL!	#NULL!	#NULL!	#NULL!	#NULL!	#NULL!	#NULL!
#NULL!	#NULL!	#NULL!	#NULL!	#NULL!	#NULL!	#NULL!	#NULL!	#NULL!	#NULL!	#NULL!	#NULL!	#NULL!	#NULL!	#NULL!	#NULL!	#NULL!	#NULL!	#NULL!	#NULL!	#NULL!	#NULL!	#NULL!	#NULL!	#NULL!	#NULL!	#NULL!
#NULL!	#NULL!	#NULL!	#NULL!	#NULL!	#NULL!	#NULL!	#NULL!	#NULL!	#NULL!	#NULL!	#NULL!	#NULL!	#NULL!	#NULL!	#NULL!	#NULL!	#NULL!	#NULL!	#NULL!	#NULL!	#NULL!	#NULL!	#NULL!	#NULL!	#NULL!	#NULL!
#NULL!	#NULL!	#NULL!	#NULL!	#NULL!	#NULL!	#NULL!	#NULL!	#NULL!	#NULL!	#NULL!	#NULL!	#NULL!	#NULL!	#NULL!	#NULL!	#NULL!	#NULL!	#NULL!	#NULL!	#NULL!	#NULL!	#NULL!	#NULL!	#NULL!	#NULL!	#NULL!
#NULL!	#NULL!	#NULL!	#NULL!	#NULL!	#NULL!	#NULL!	#NULL!	#NULL!	#NULL!	#NULL!	#NULL!	#NULL!	#NULL!	#NULL!	#NULL!	#NULL!	#NULL!	#NULL!	#NULL!	#NULL!	#NULL!	#NULL!	#NULL!	#NULL!	#NULL!	#NULL!
#NULL!	#NULL!	#NULL!	#NULL!	#NULL!	#NULL!	#NULL!	#NULL!	#NULL!	#NULL!	#NULL!	#NULL!	#NULL!	#NULL!	#NULL!	#NULL!	#NULL!	#NULL!	#NULL!	#NULL!	#NULL!	#NULL!	#NULL!	#NULL!	#NULL!	#NULL!	#NULL!
